# Supplementary material for: Inhibition of the Myocardin-Related Transcription Factor Pathway Increases Efficacy of Trametinib in NRAS-Mutant Melanoma Cell Lines
Source: MDPI journal article supplement (doi:10.3390/cancers13092012), 2021-04-22
Supplement: s1 [file s1]

## Inhibition of the Myocardin-Related Transcription Factor Pathway Increases Efficacy of Trametinib in *NRAS*-Mutant Melanoma Cell Lines

Kathryn M. Appleton, Charuta C. Palsuledesai, Sean A. Misek, Maja Blake, Joseph Zagorski, Kathleen A. Gallo, Thomas S. Dexheimer and Richard R. Neubig

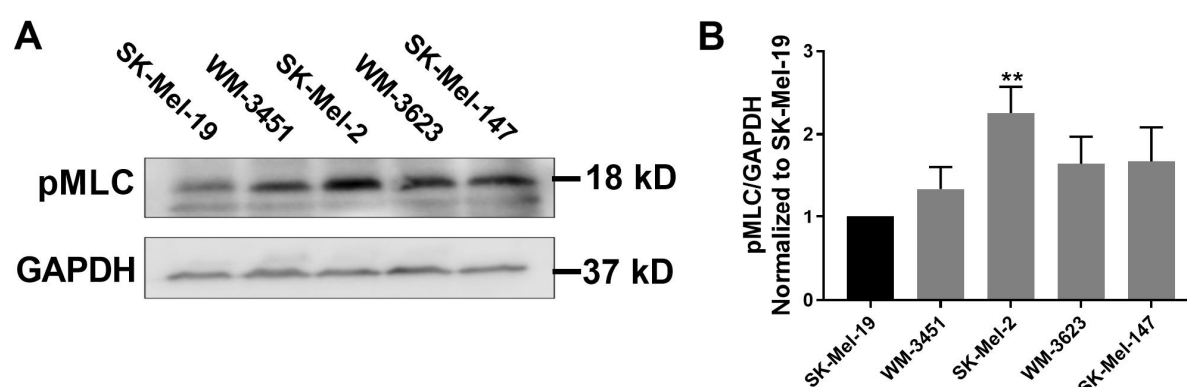

**Supplementary Figure S1. Expression of phospho-myosin light chain (pMLC) in melanoma cell lines.** **A.** Immunoblots were conducted across the melanoma cell line panel to detect pMLC or GAPDH as a protein loading control. **B.** Quantitative band density analysis was performed for each experiment comparing the intensity of pMLC relative to control GAPDH then normalized to the value for SK-Mel-19 from the same experiment. Results are expressed as the mean ( $\pm$ SEM) of five experiments ( $n=5$ , \*\* $p<0.01$  vs. SK-Mel-19, One-way ANOVA, with Dunnett's post-test).

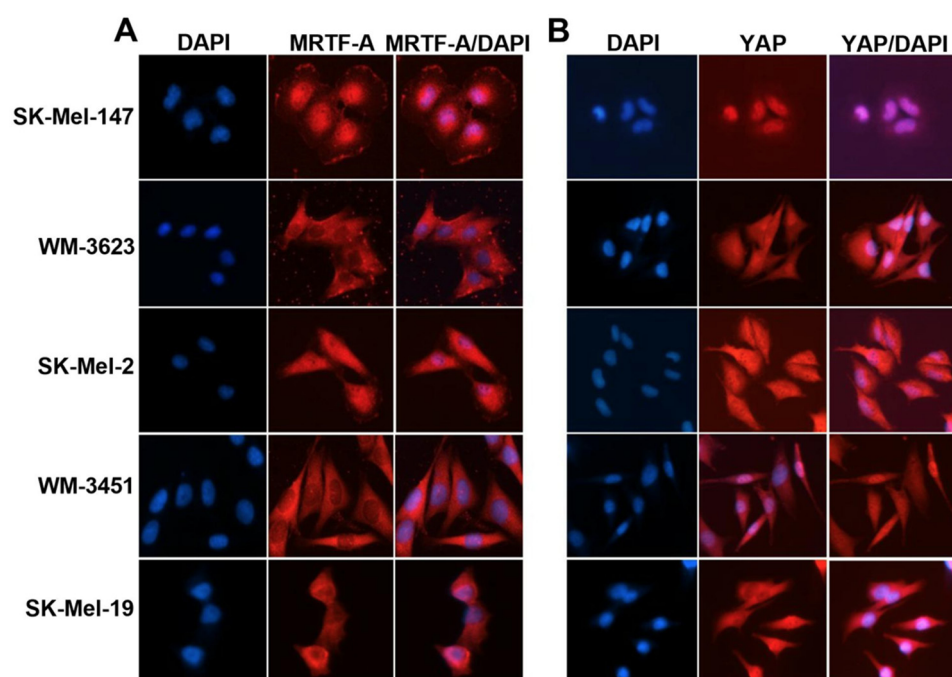

**Supplementary Figure S2. Localization of MRTF-A and YAP in melanoma cell lines.** **A.** Representative images of the cellular localization of MRTF-A using immunofluorescence in melanoma cell lines (10% FBS). **B.** Representative images of the cellular localization of YAP using immunofluorescence in melanoma cell lines (10% FBS).

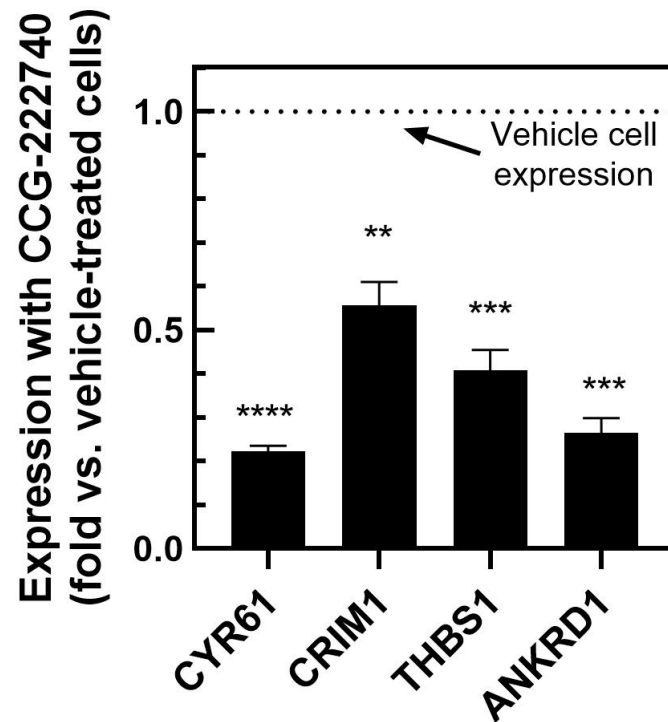

**Supplementary Figure S3. Effect of CCG-222740 on expression of MRTF-target genes in SK-Mel-147 cells.** CCG-222740 treatment reduces expression of MRTF target genes *CYR61*, *CRIM1*, *THBS1* and *ANKRD1*. SK-Mel-147 cells were treated for 24 hours with 10  $\mu$ M CCG-222740 or DMSO (0.02%) before isolation of RNA for qPCR analysis. Expression of target genes were normalized against *GAPDH* and results are expressed as the mean ( $\pm$ SEM) of triplicate experiments (n=3, \*,  $P < 0.01$ , \*\*,  $P < 0.001$ , \*\*\*,  $P < 0.0001$ , \*\*\*\*,  $P < 0.00001$  vs. DMSO control).

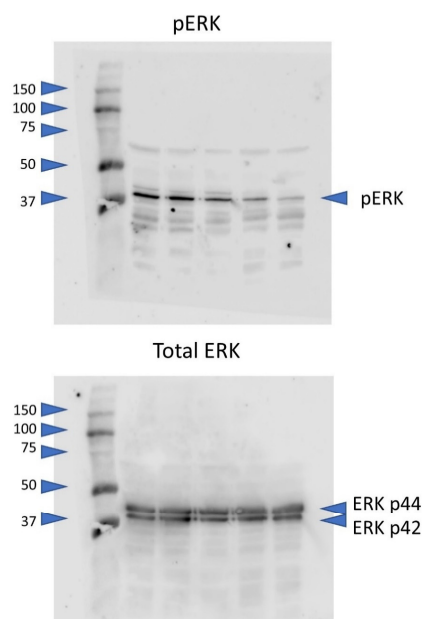

**Supplementary Figure S4 Full blots for ERK and pERK supporting Figure 1C & D**

# Western Blot of phospho-MLC2

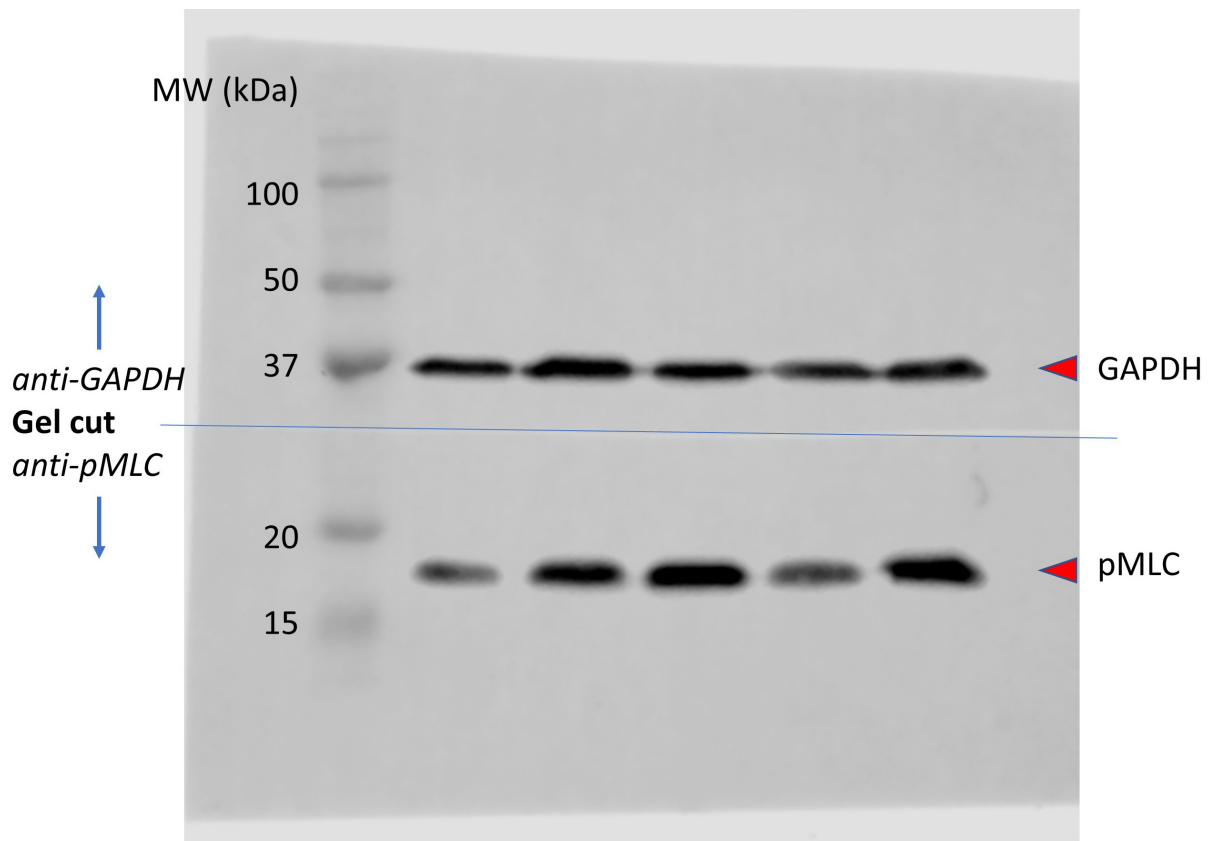

Supplementary Figure S5 Full blot for pMLC and GAPDH supporting Figure S1

**Supplementary Table S1.** RNA-Seq analysis of differential gene expression in SK-Mel-147 cells upon 24-hour treatment with CCG-222740. Effects of 10 mM CCG-222740 in SK-Mel-147 cells was compared to untreated cells. See Methods section 4.8 of main manuscript for experimental details. Negative logFC values indicate genes downregulated upon CCG-222740 treatment, and positive values indicate genes upregulated upon CCG-222740 treatment. Raw RNA-Seq reads and processed HTSeq read counts are available on GEO under GSE134320.

| Ensembl ID      | Approved Symbol    | logFC        | logCPM       | PValue   | FDR         |
|-----------------|--------------------|--------------|--------------|----------|-------------|
| ENSG00000168003 | <i>SLC3A2</i>      | 1.740277527  | 8.507639444  | 1.21E-14 | 7.71E-10    |
| ENSG00000115380 | <i>EFEMP1</i>      | -1.706565216 | 3.530197807  | 9.55E-11 | 3.04E-06    |
| ENSG00000091986 | <i>CCDC80</i>      | -1.495390124 | 4.347019002  | 4.67E-09 | 9.92E-05    |
| ENSG00000181449 | <i>SOX2</i>        | 2.140598107  | 0.239972409  | 3.44E-08 | 0.000547402 |
| ENSG00000104419 | <i>NDRG1</i>       | 1.363870834  | 5.978803232  | 4.66E-08 | 0.000586459 |
| ENSG00000148677 | <i>ANKRD1</i>      | -1.397055415 | 4.627081746  | 5.59E-08 | 0.000586459 |
| ENSG00000150938 | <i>CRIM1</i>       | -1.308149346 | 6.808500344  | 6.45E-08 | 0.000586459 |
| ENSG00000224773 | <i>HSPA8P7</i>     | -1.98036841  | 2.305467038  | 1.86E-07 | 0.001477206 |
| ENSG00000137801 | <i>THBS1</i>       | -1.185139541 | 10.08725598  | 2.85E-07 | 0.00201518  |
| ENSG00000196878 | <i>LAMB3</i>       | 1.137023364  | 7.353579658  | 9.04E-07 | 0.005469966 |
| ENSG00000213820 | <i>RPL13P2</i>     | -2.378109738 | 2.097258073  | 9.45E-07 | 0.005469966 |
| ENSG00000128564 | <i>VGF</i>         | 1.413051246  | 1.555022873  | 1.3E-06  | 0.006602879 |
| ENSG00000154734 | <i>ADAMTS1</i>     | -1.102716883 | 6.357359483  | 1.35E-06 | 0.006602879 |
| ENSG00000236105 | <i>PRELID3BP10</i> | -2.521855225 | -0.667607432 | 1.89E-06 | 0.008593398 |
| ENSG00000231445 | <i>TIMM8AP1</i>    | -2.03756353  | -0.277981649 | 2.78E-06 | 0.01016252  |
| ENSG00000129757 | <i>CDKN1C</i>      | 1.19260645   | 3.011058803  | 2.85E-06 | 0.01016252  |
| ENSG00000142871 | <i>CYR61</i>       | -1.036485735 | 9.347827715  | 2.87E-06 | 0.01016252  |
| ENSG00000092969 | <i>TGFB2</i>       | -1.146679925 | 4.714269799  | 3.1E-06  | 0.010396226 |
| ENSG00000052841 | <i>TTC17</i>       | 1.075378747  | 6.169282608  | 5.58E-06 | 0.017771644 |
| ENSG00000078401 | <i>EDN1</i>        | -1.202295537 | 3.121136369  | 5.94E-06 | 0.018013191 |
| ENSG00000052802 | <i>MSMO1</i>       | 1.079766996  | 5.379290384  | 7.15E-06 | 0.020689773 |
| ENSG00000138798 | <i>EGF</i>         | -1.282835697 | 2.550065363  | 7.79E-06 | 0.021564115 |
| ENSG00000170439 | <i>METTL7B</i>     | 1.152224231  | 2.41811322   | 1.06E-05 | 0.028090638 |
| ENSG00000114251 | <i>WNT5A</i>       | -1.050718673 | 5.271773994  | 1.39E-05 | 0.032740269 |
| ENSG00000232480 | <i>TGFB2-AS1</i>   | -1.851166895 | 0.032554217  | 1.4E-05  | 0.032740269 |
| ENSG00000168028 | <i>RPSA</i>        | -1.157332873 | 6.684989777  | 1.44E-05 | 0.032740269 |
| ENSG00000145632 | <i>PLK2</i>        | -0.9729373   | 7.098792127  | 1.44E-05 | 0.032740269 |
| ENSG00000151892 | <i>GFRA1</i>       | -1.241962153 | 1.757886426  | 1.67E-05 | 0.035350063 |
| ENSG00000170523 | <i>KRT83</i>       | -1.706326252 | 0.010133492  | 2.25E-05 | 0.045127787 |
| ENSG00000214274 | <i>ANG</i>         | 1.837466378  | -0.700807455 | 2.27E-05 | 0.045127787 |

**Supplementary Table S2 Intensities for ERK and pERK supporting Figure 1C & D**

*Individual band ratios from Figure 1 – three independent experiments*

|                          | SK-Mel-19    | WM-3451      | SK-Mel-2     | WM-3623      | SK-Mel-147   |
|--------------------------|--------------|--------------|--------------|--------------|--------------|
| <b>Experiment 1</b>      |              |              |              |              |              |
| <i>pERK</i>              | 4.22         | 4.38         | 2.92         | 1.64         | 1.09         |
| <i>ERK1/2</i>            | 7.96         | 8.8          | 8.36         | 9.21         | 9.77         |
| <i>pERK/ERK ratio</i>    | 0.530        | 0.498        | 0.349        | 0.178        | 0.112        |
| <b>norm to SK-Mel-19</b> | <b>1.000</b> | <b>0.939</b> | <b>0.659</b> | <b>0.336</b> | <b>0.210</b> |
|                          |              |              |              |              |              |
| <b>Experiment 2</b>      |              |              |              |              |              |
| <i>pERK</i>              | 4.85         | 4.86         | 3.36         | 2.73         | 1.18         |
| <i>ERK1/2</i>            | 28.6         | 24.3         | 27.5         | 30.6         | 33.2         |
| <i>pERK/ERK ratio</i>    | 0.170        | 0.200        | 0.122        | 0.089        | 0.036        |
| <b>norm to SK-Mel-19</b> | <b>1.000</b> | <b>1.179</b> | <b>0.720</b> | <b>0.526</b> | <b>0.210</b> |
|                          |              |              |              |              |              |
| <b>Experiment 3</b>      |              |              |              |              |              |
| <i>pERK</i>              | 4.92         | 5.21         | 4.44         | 1.86         | 1.48         |
| <i>ERK1/2</i>            | 12.4         | 12.1         | 13.8         | 20.8         | 20.4         |
| <i>pERK/ERK ratio</i>    | 0.397        | 0.431        | 0.322        | 0.089        | 0.073        |
| <b>norm to SK-Mel-19</b> | <b>1.000</b> | <b>1.085</b> | <b>0.811</b> | <b>0.225</b> | <b>0.183</b> |

**Supplementary Table 3 Intensities ratios for pMLC/GAPDH vs SK-Mel-19 supporting Figure S1**

***Individual band ratios from Figure S1***

|                    | SK-Mel-19 | WM-3451 | SK-Mel-2 | WM-3623 | SK-Mel-147 |
|--------------------|-----------|---------|----------|---------|------------|
| GAPDH              | 1.07      | 1.26    | 1.06     | 1.27    | 1.06       |
| pMLC               | 0.97      | 1.11    | 1.89     | 1.36    | 1.49       |
| pMLC/GAPDH         | 0.902     | 0.881   | 1.783    | 1.071   | 1.406      |
| Norm to SK-Mel-19* | 1*        | 0.977   | 1.977    | 1.187   | 1.559      |

***Normalized band ratios from 5 independent experiments***

| SK-Mel-19 | WM-3451 | SK-Mel-2 | WM-3623 | SK-Mel-147 |
|-----------|---------|----------|---------|------------|
| 1         | 1.242   | 2.092    | 1.271   | 1.880      |
| 1         | 1.143   | 2.009    | 2.344   | 0.765      |
| 1         | 2.385   | 3.488    | 2.510   | 3.116      |
| 1         | 0.954   | 1.721    | 0.917   | 1.047      |
| 1*        | 0.977   | 1.977    | 1.187   | 1.559      |

\* Data from blot in Figure S1
